# Supplementary material for: Predictors of Job Satisfaction Among Peer Providers on Professional Treatment Teams in Community-Based Agencies
Source: Atypon-hosted journal article supplement (doi:10.1176/appi.ps.001452012), 2013-02-01
Supplement: 181_ds001.pdf [file 181_ds001.pdf]

*Demographic Characteristics of Sample*

|                                    |       |      |
|------------------------------------|-------|------|
| Participants (n)                   | 100   |      |
| Age                                |       |      |
| M                                  | 50.32 |      |
| SD                                 | 9.77  |      |
| Minimum                            | 21    |      |
| Maximum                            | 68    |      |
|                                    | Freq. | (%)  |
| Gender                             |       |      |
| Male                               | 36    | 36.0 |
| Female                             | 64    | 64.0 |
| Race                               |       |      |
| White                              | 87    | 87.0 |
| Black                              | 8     | 8.0  |
| American Indian/<br>Alaskan Native | 1     | 1.0  |
| Multi-Racial                       | 4     | 4.0  |
| Ethnicity                          |       |      |
| Hispanic                           | 4     | 4.0  |
| Non-Hispanic                       | 84    | 84.0 |
| Missing                            | 12    | 12.0 |
| Education                          |       |      |
| HS/GED                             | 8     | 8.0  |
